# Supplementary material for: Synthesis and X-ray structure of a new zinc(ii) coordination polymer: interaction with DNA and double stranded RNA and elucidation of the molecular aspects of the binding to bovine serum albumin
Source: Royal Society of Chemistry journal article supplement (doi:10.1039/c4ra06588c), 2014-01-01
Supplement: c4ra06588c1.pdf [file c4ra06588c1.pdf]

**Synthesis, X-ray Structure of a New Zinc(II) Coordination Polymer : Interaction With DNA, Double Stranded RNA and Elucidation of the Molecular Aspects of the Binding to Bovine Serum Albumin.**

Swapan K. Jana,<sup>†,§</sup> Saikat K. Seth,<sup>⊥</sup> Horst Puschmann,<sup>‡</sup> Maidul Hossain,<sup>\*,†, §</sup> and Sudipta Dalai,<sup>\*, †,§</sup>

<sup>†</sup> Department of Chemistry and Chemical Technology, Vidyasagar University, Midnapore 721 102, West Bengal, India.

<sup>⊥</sup> Department of Physics, M. G. Mahavidyalaya, Bhupatinagar, Purba Medinipur, West Bengal- 721425, India.

<sup>‡</sup> Department of Chemistry, Durham University, Durham DH1 3LE, UK

-----  
**■ AUTHOR INFORMATION**

Corresponding Authors

\*(M.H.) E-mail: [hossainm@mail.vidyasagar.ac.in](mailto:hossainm@mail.vidyasagar.ac.in)/[maidulhossain@yahoo.com](mailto:maidulhossain@yahoo.com)

\*(S.D.) E-mail: [sudipta@mail.vidyasagar.ac.in](mailto:sudipta@mail.vidyasagar.ac.in) / [icsdalai@gmail.com](mailto:icsdalai@gmail.com)

Author Contributions

§ These authors made equal contributions.  
-----

## Supplementary Information

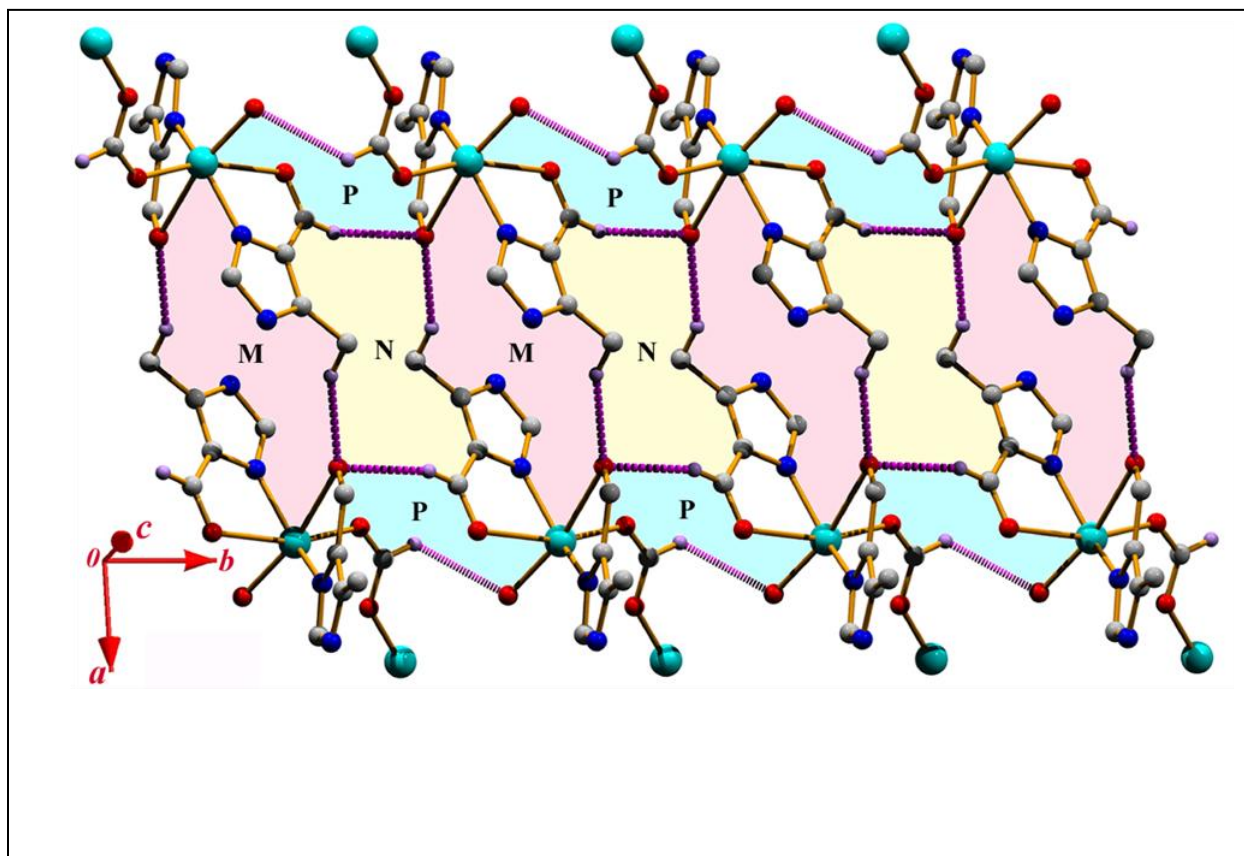

**Fig. S1** Formation of ring motifs and propagation of 1D network along (0 1 0) direction.

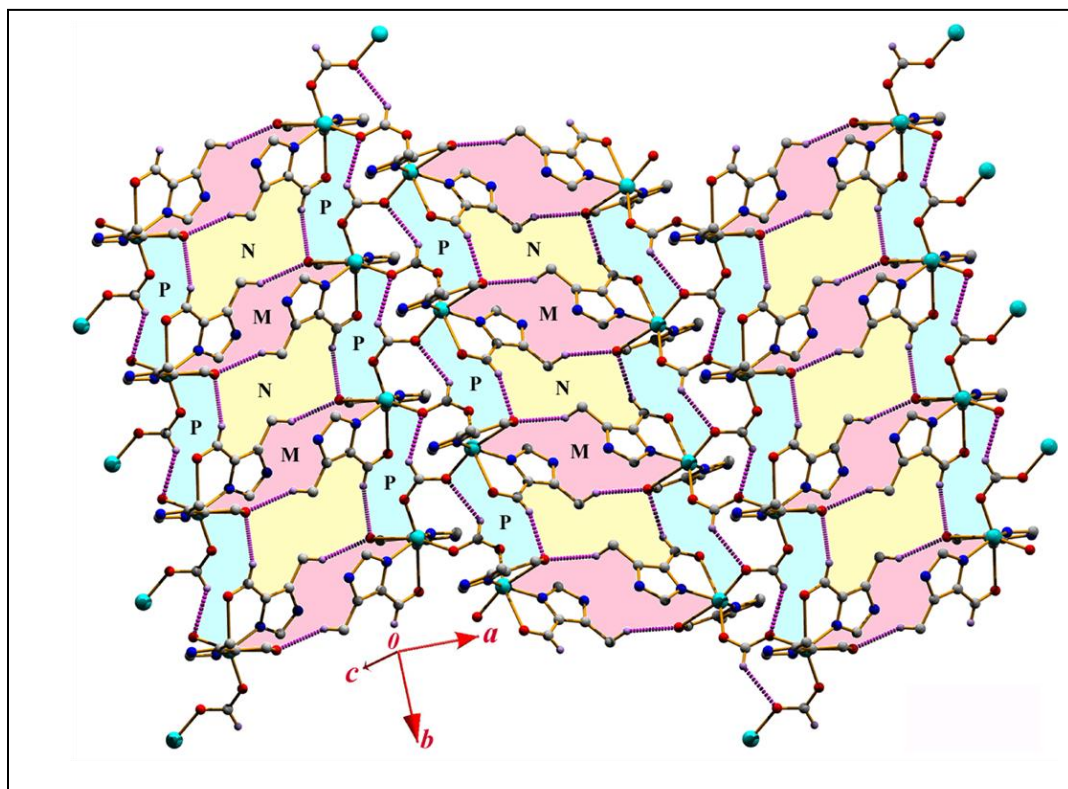

**Fig. S2** Generation of 2D supramolecular layer network through weak C–H···O hydrogen bonds and multiple ring motifs are acting as building blocks.

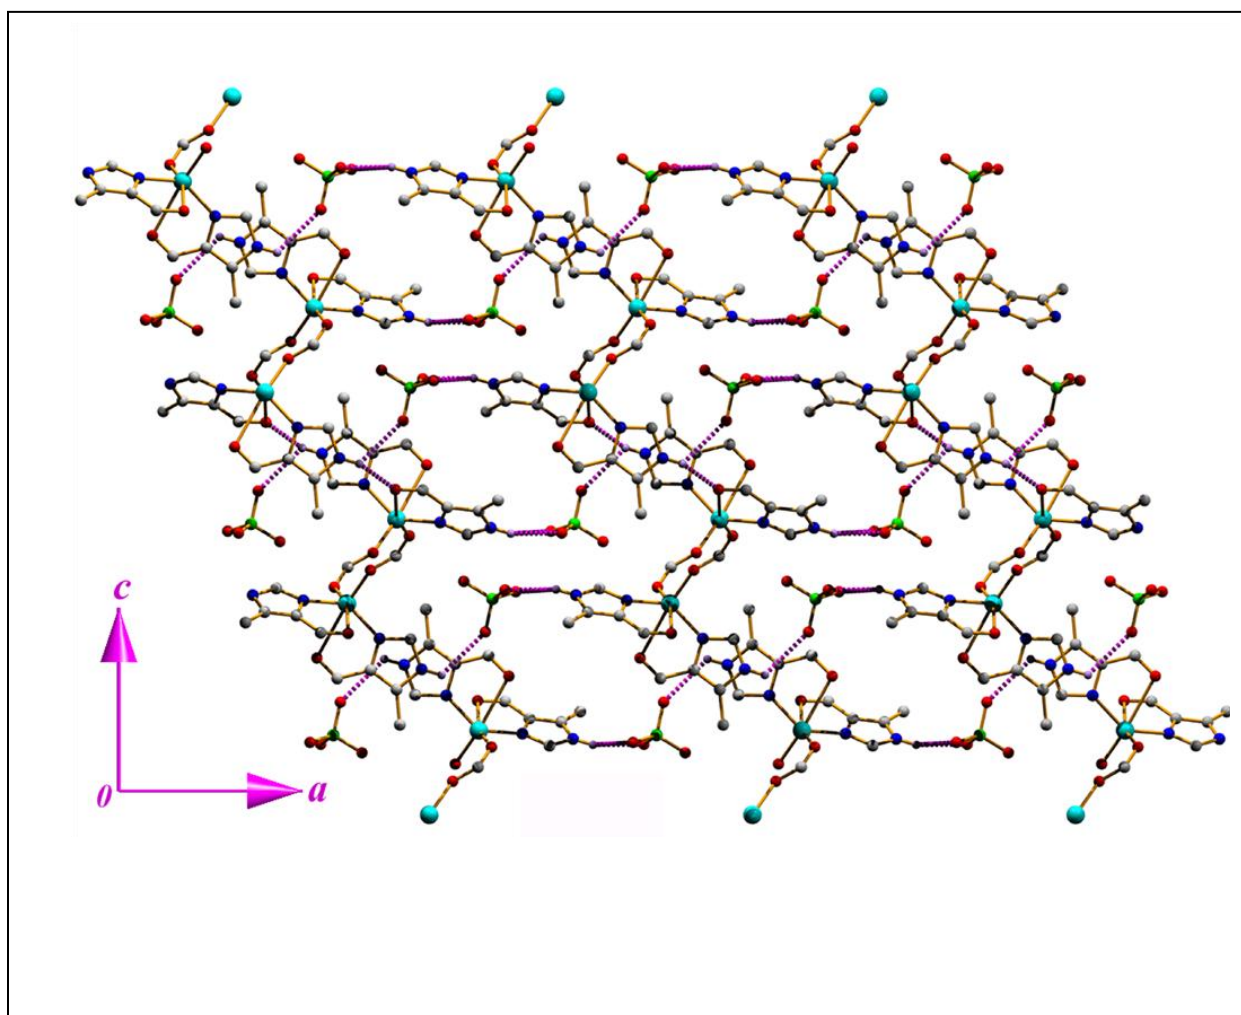

**Fig. S3** Formation of another 2D supramolecular network through N–H···O hydrogen bonds.

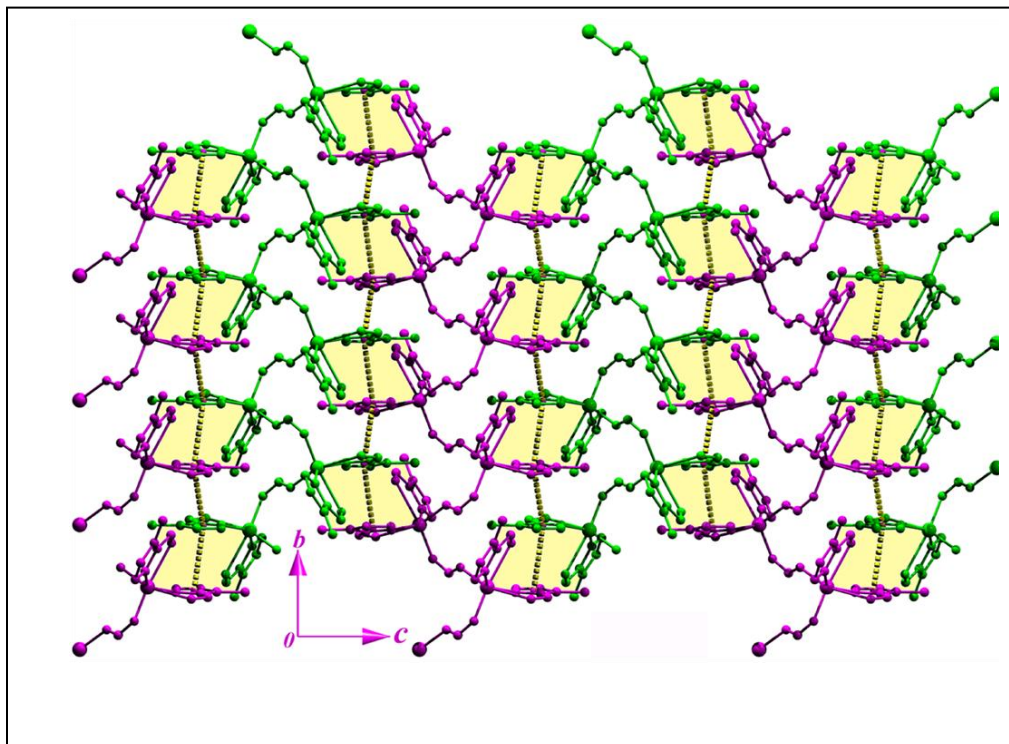

**Fig.S4** Perspective view of the unique multi  $\pi$ -stacked layer assembly.

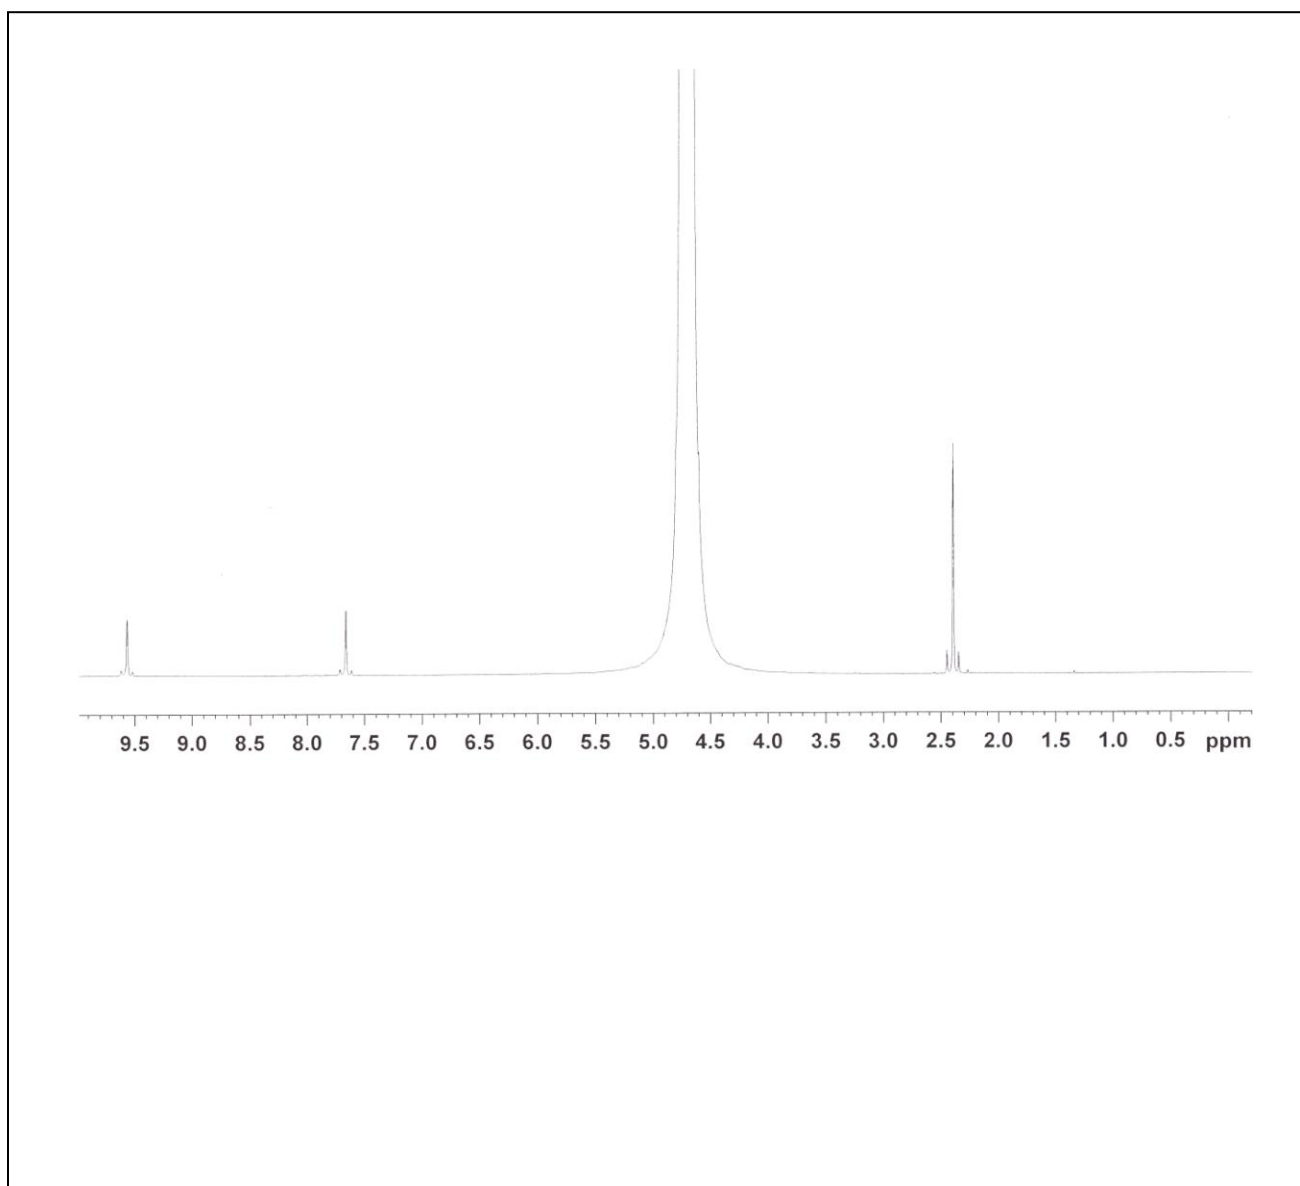

**Fig.S5**  $^1\text{H}$  NMR spectra in  $\text{D}_2\text{O}$  of the free ligand (4-Me-5-CHOIm) .

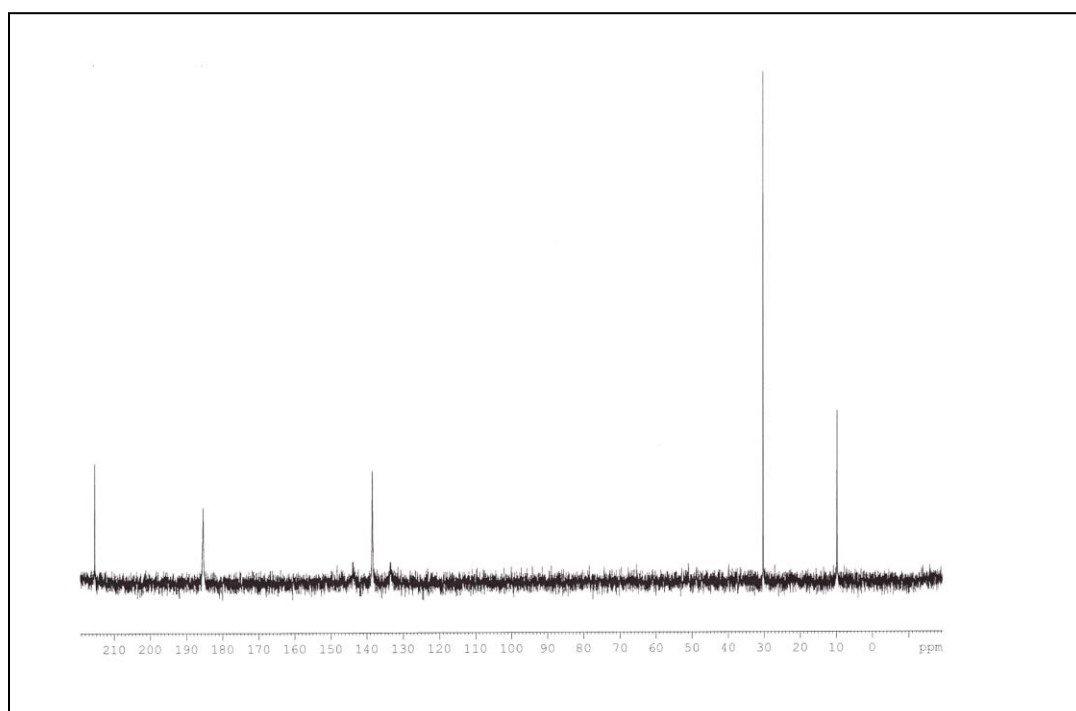

**Fig.S6**  $^{13}\text{C}$  NMR spectra in  $\text{D}_2\text{O}$  of the free ligand (4-Me-5-CHOIm) .

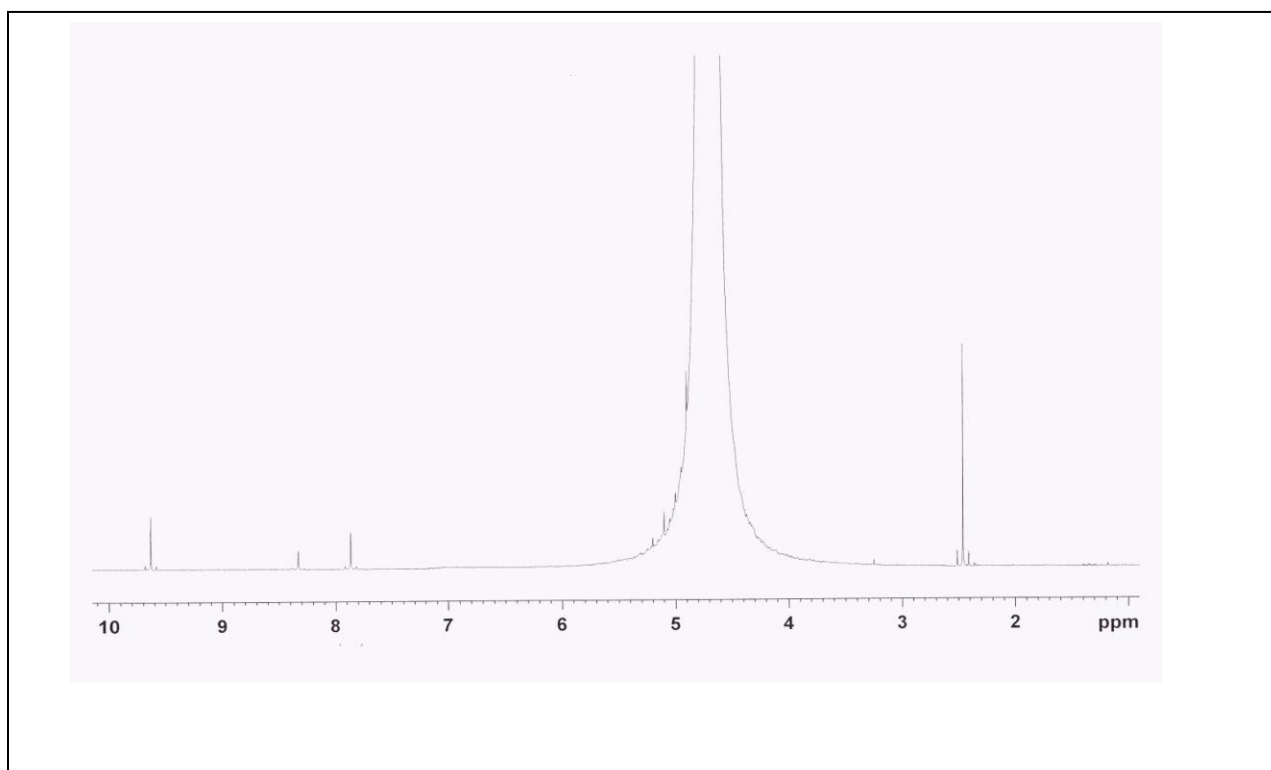

**Fig.S7**  $^1\text{H}$  NMR spectra in  $\text{D}_2\text{O}$  of the complex  $[\text{Zn}(\text{4-Me-5-CHOIm})_2(\text{HCOO})](\text{ClO}_4)$ .



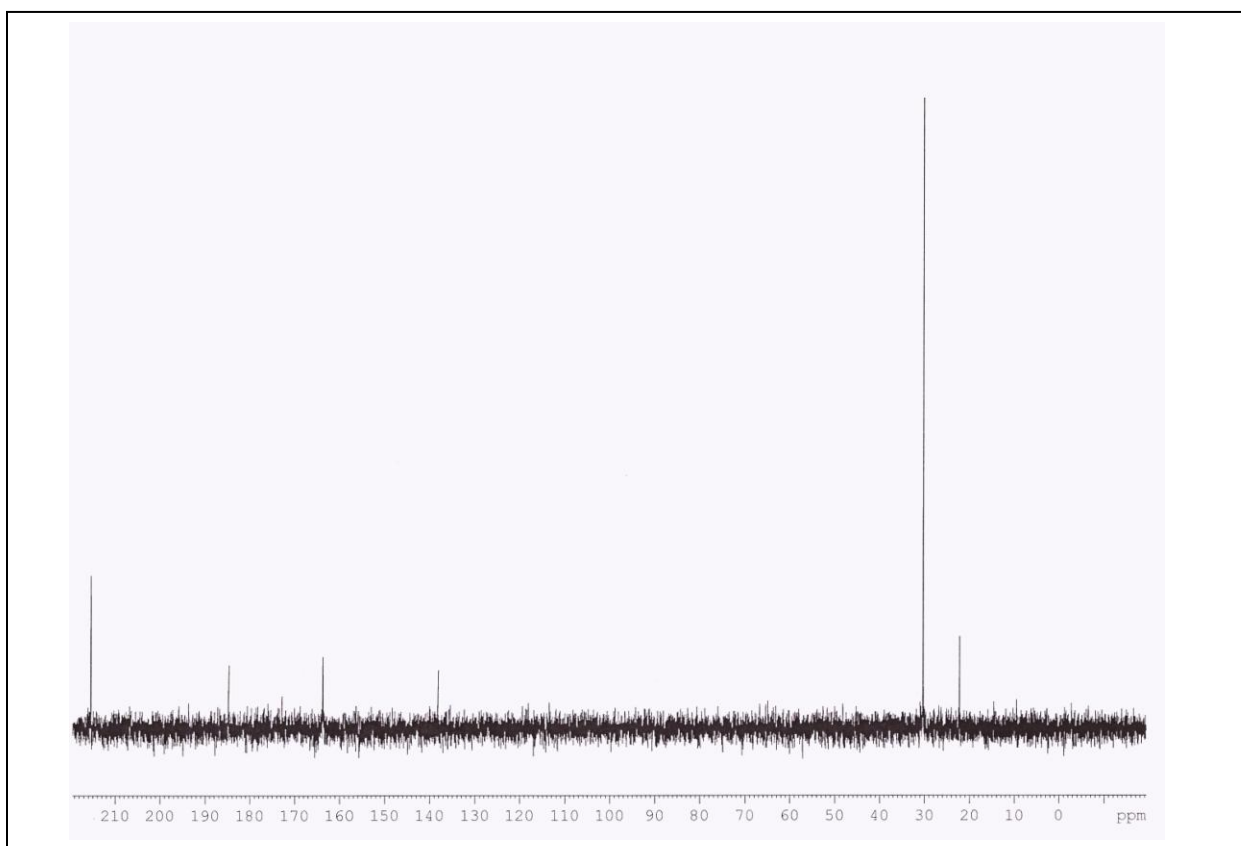

**Fig.S8**  $^{13}\text{C}$  NMR spectra in  $\text{D}_2\text{O}$  of the complex  $[\text{Zn}(\text{4-Me-5-CHOIm})_2(\text{HCOO})](\text{ClO}_4)$ .

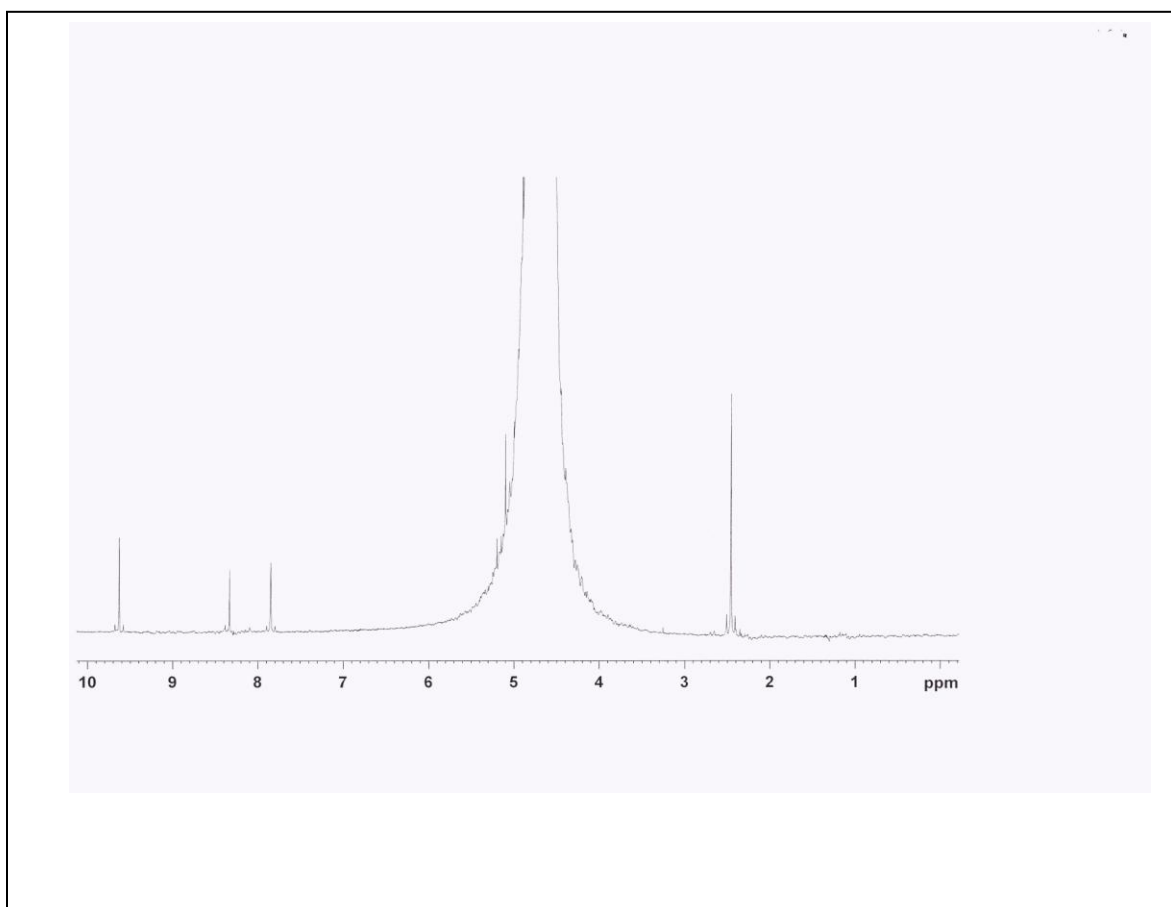

**Fig.S9**  $^1\text{H}$  NMR spectra in  $\text{D}_2\text{O}$  of DNA + complex  $[\text{Zn}(4\text{-Me-5-CHOIm})_2(\text{HCOO})](\text{ClO}_4)$ ..

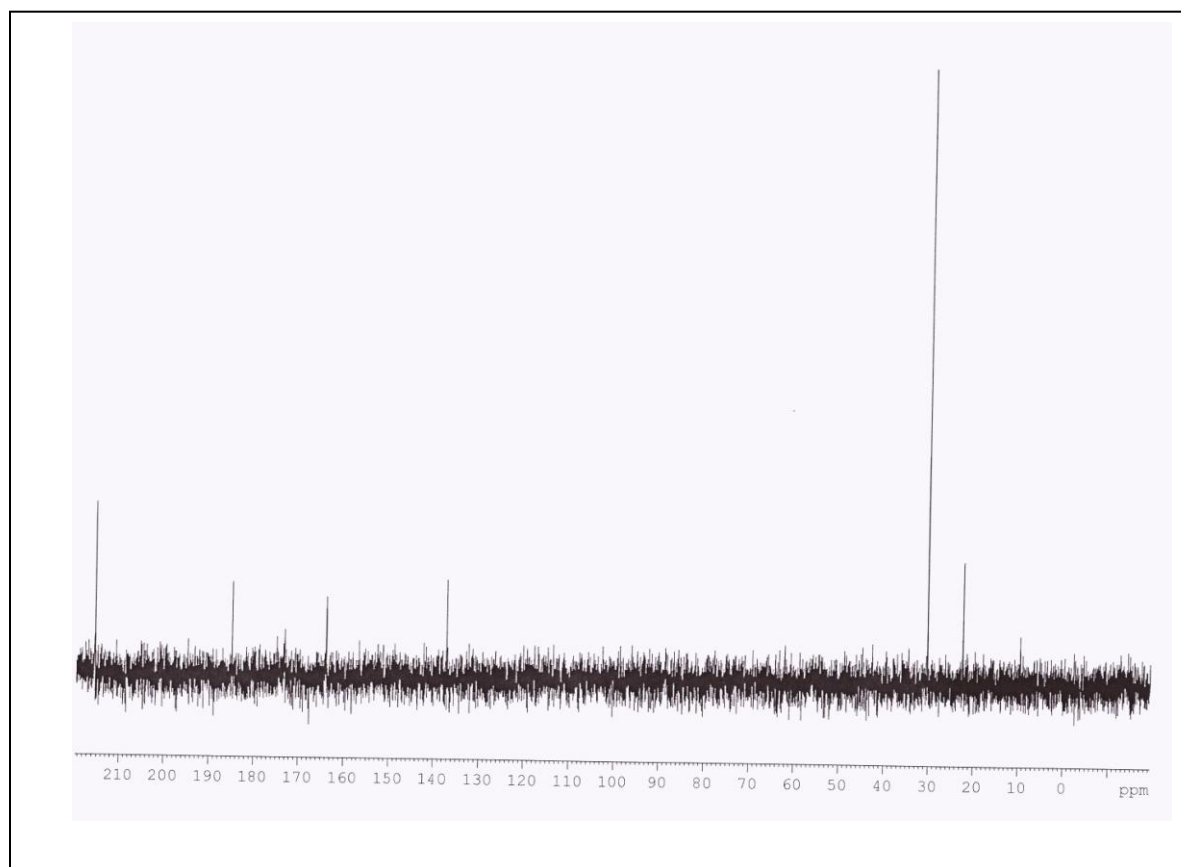

**Fig.S10**  $^{13}\text{C}$  NMR spectra in  $\text{D}_2\text{O}$  of DNA + complex  $[\text{Zn}(4\text{-Me-5-CHOIm})_2(\text{HCOO})](\text{ClO}_4)$ .

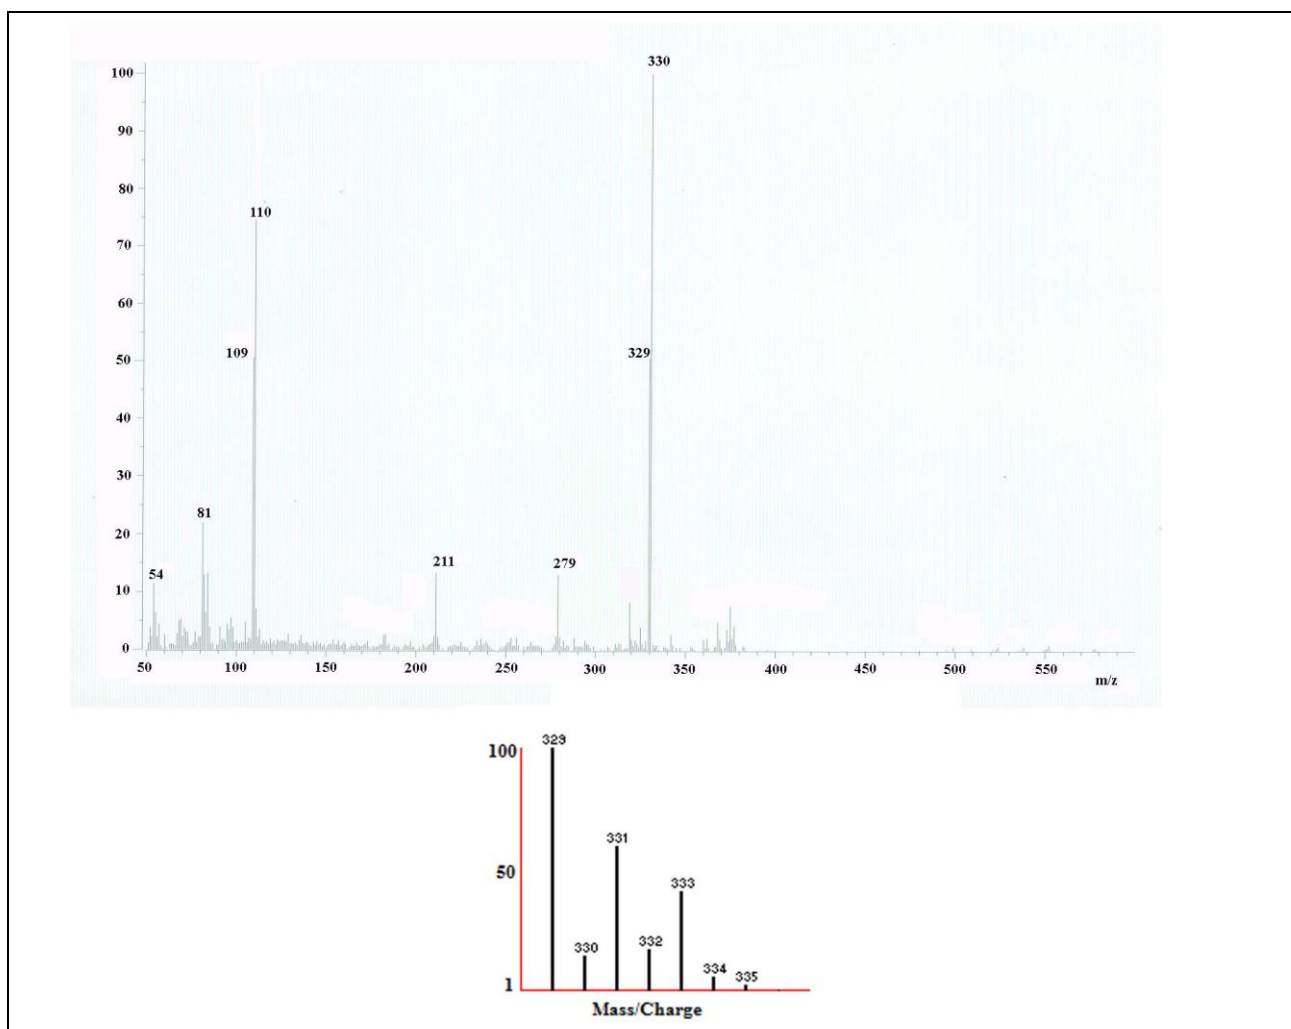

**Fig.S11** m/z = 50 – 550 range of the ESI-MS spectrum of an aqueous solution of the complex and the simulated isotope distributions for  $[\text{Zn}(4\text{-Me-5-CHOIm})_2(\text{HCOO})]^+$ .

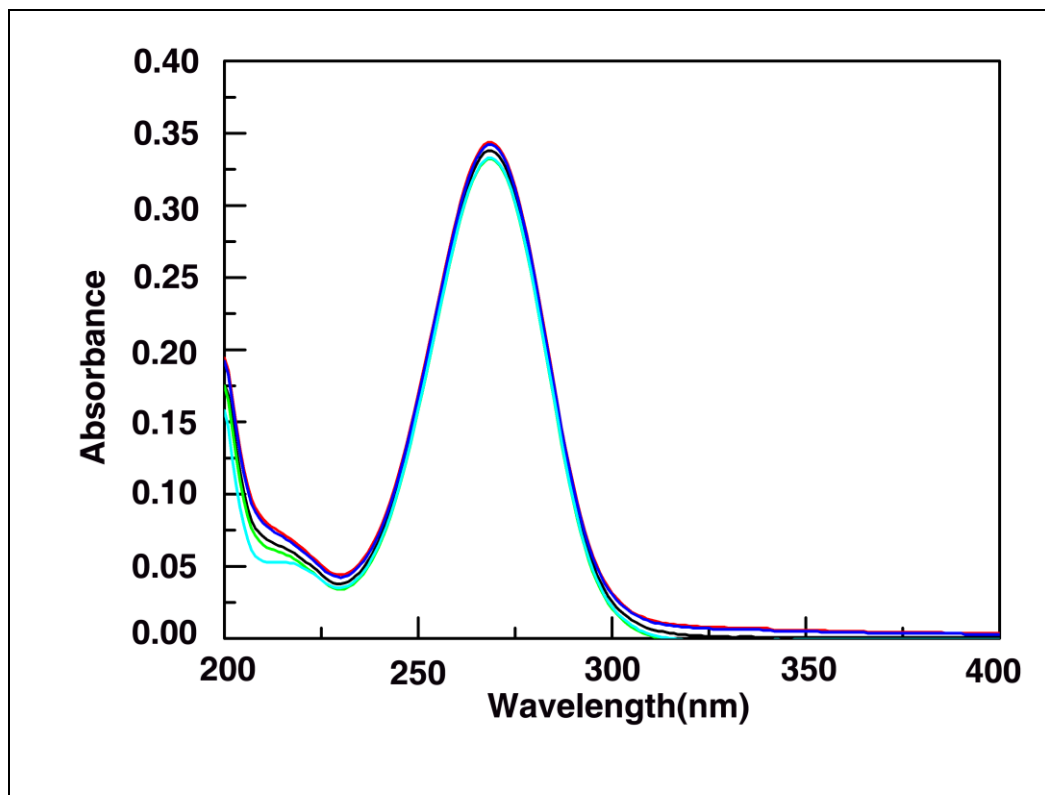

**Fig.S12** Absorption spectral changes of 4-Me-5-CHOIm (5 μM) treated with 0, 5, 10, 15 and 20 μM (curves 1–5) of CT-DNA.

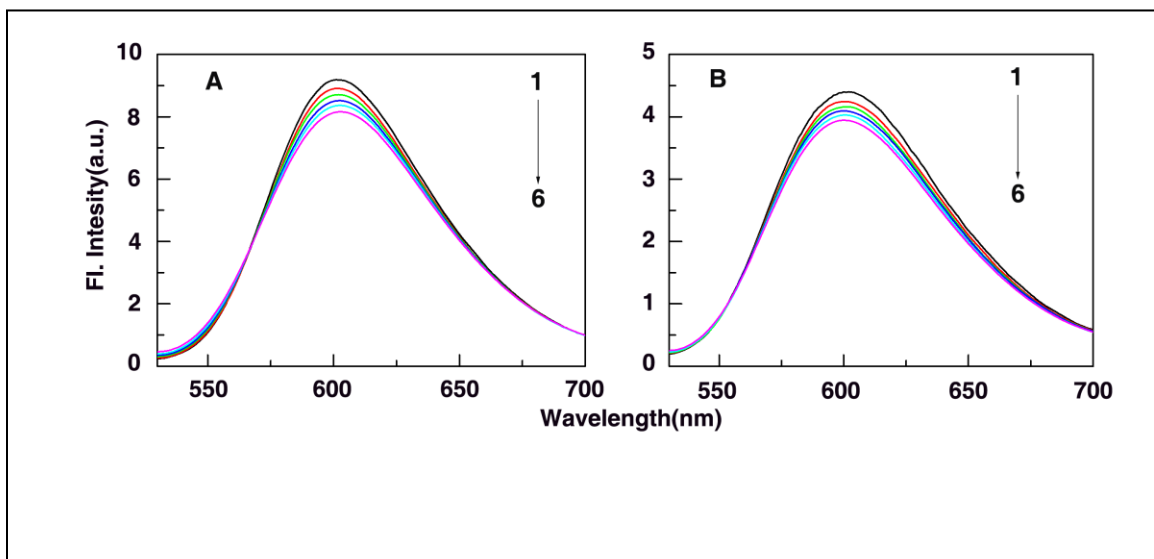

**Fig. S13** Emission spectra of EtBr( $5\ \mu\text{M}$ ) bound to the CT-DNA( $15\ \mu\text{M}$ ) (A) and (B)RNA(PolyI.polyC)( $15\ \mu\text{M}$ ) treated with increasing concentration of Zn complex. In panel (A,B) curves (1-6) denote 0, 10, 20,30, 40, and  $50\ \mu\text{M}$  of Zn complex.

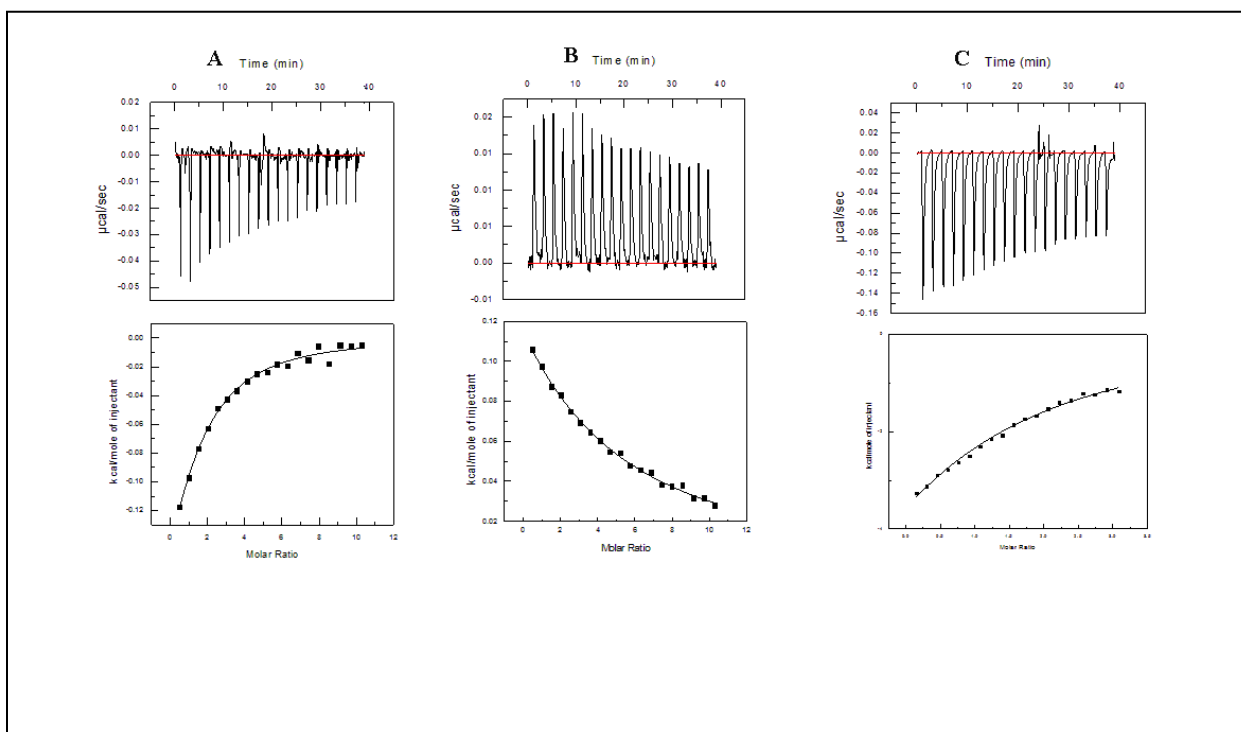

**Fig. S14** ITC profiles for the binding of  $\text{Zn}(\text{ClO}_4)_2$  to (A) CT-DNA, (B) RNA (PolyC.PolyI) and (C) BSA. Top panels present raw results for the sequential injection of (A) CT-DNA, (B) RNA (PolyC.PolyI) and (C) BSA in citrate-phosphate buffer, pH 7.01 at 25 °C .The bottom panels show the integrated heat results after correction of heat of dilution against the mole ratio. The data points were fitted to one site model and the solid lines represent the best-fit data.

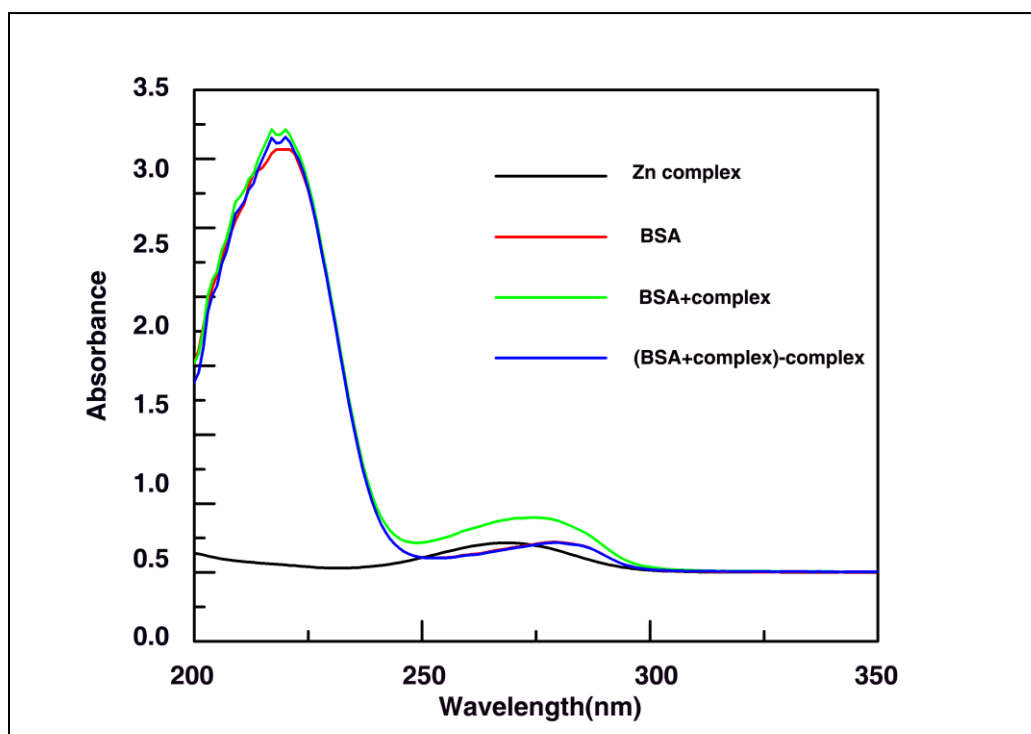

**Fig. S15** UV/vis absorption spectra of BSA (5 μM, pH ~7.01) in the presence of Zn complex (5 μM).



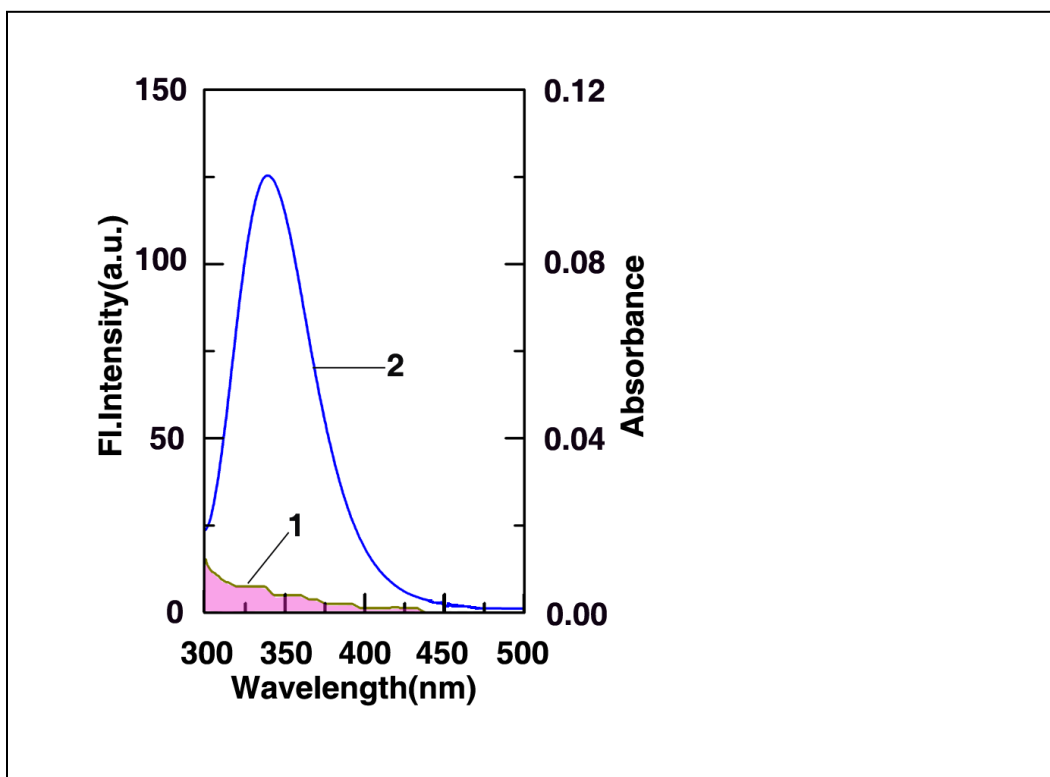

**Fig. S16** Overlap (shaded portion) of the BSA fluorescence spectra (donor) and absorption spectra (acceptor) of Zn complex. In panel curve 1 represents absorption spectra of complex and curve 2 represents the fluorescence spectrum of BSA at pH 7.01. The excitation of BSA was done at 295 nm. The ratio of the concentration of [BSA]:[complex] = 1:1.

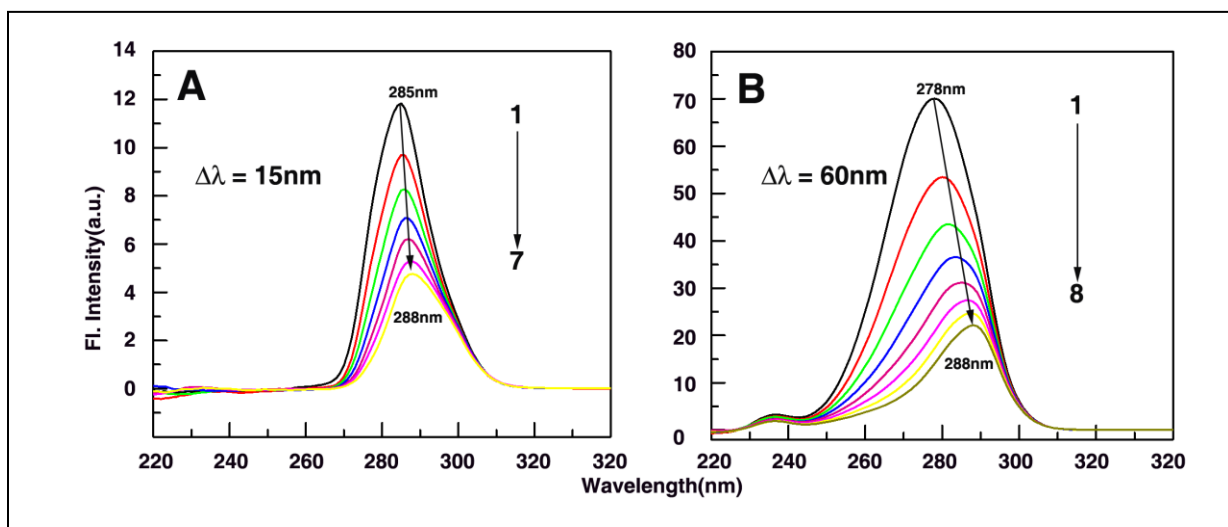

**Fig.S17** Synchronous fluorescence ( $\Delta\lambda = 15$  and  $60$  nm) spectra of BSA in the presence of different concentrations of (A, B) [BSA] =  $5 \mu\text{M}$ . In panel (A), curves 1–7 denote 0 to  $48 \mu\text{M}$  range of Zn complex and in panel (B), curves 1–8 denote 0 to  $56 \mu\text{M}$  of Zn complex.

**Table S1** Data derived from three-dimensional fluorescence from the interaction of BSA and BSA-Zn complex system.

| System         | Fluorescence Peak 1                                                                          |                                      | Fluorescence Peak 2                                                                          |                                         |
|----------------|----------------------------------------------------------------------------------------------|--------------------------------------|----------------------------------------------------------------------------------------------|-----------------------------------------|
|                | Peak position<br>( $\lambda_{\text{ex}}/\lambda_{\text{em}}/\text{Intensity}$ )<br>(nm/nm/F) | Stokes shift<br>$\Delta\lambda$ (nm) | Peak position<br>( $\lambda_{\text{ex}}/\lambda_{\text{em}}/\text{Intensity}$ )<br>(nm/nm/F) | Stokes<br>shift<br>$\Delta\lambda$ (nm) |
| BSA            | 280/340/748.4                                                                                | 60                                   | 230/340/298.9                                                                                | 110                                     |
| BSA-Zn complex | 290/340/310.3                                                                                | 50                                   | 230/340/245.8                                                                                | 110                                     |

**Table S2** ITC derived thermodynamic parameters for the binding of  $\text{Zn}(\text{ClO}_4)_2$  to CT-DNA, RNA and BSA in CP buffer of 10mM  $[\text{Na}^+]$ , pH 7.01 <sup>a</sup>

|                  | Temperature<br>(K) | Binding constant<br>( $K_b$ ) $\text{M}^{-1}$ | Stoichiometry<br>(N) | $\Delta G$<br>(kca/mol) | $\Delta H$<br>(kca/mol) | $T\Delta S$<br>(kca/mol) |
|------------------|--------------------|-----------------------------------------------|----------------------|-------------------------|-------------------------|--------------------------|
| CT-DNA           | 298.15             | $(2.4 \pm 0.19) \times 10^4$                  | 0.95±0.05            | -7.17±1.90              | -0.50±0.02              | 5.57                     |
| RNA(polyI.polyC) | 298.15             | $(4.06 \pm 0.11) \times 10^3$                 | 0.98±0.04            | -7.44 ± 0.03            | 1.46 ± 0.02             | 6.38                     |
| BSA              | 298.15             | $(4.26 \pm 0.11) \times 10^4$                 | 0.99±0.05            | -6.34 ± 0.20            | -7.62± 0.40             | -1.28                    |

<sup>a</sup> Average from two determinations each. All ITC profiles fit to a model of single binding sites.
